# Supplementary material for: The impacts associated with having ADHD: an umbrella review
Source: Front Psychiatry. 2024 May 21;15:1343314. doi: 10.3389/fpsyt.2024.1343314 (PMC11151783; doi:10.3389/fpsyt.2024.1343314)
Supplement: Supplementary file 1 [file DataSheet_1.xlsx]

## Sheet: Sheet1
Citation	Notes BF	Final decision
A. G. Sensory processing problems in children with ADHD, a systematic review. Psychiatry Investigation. 2011;8(2):89-94.	sensory processing	ADHD & executive function
A. K, M. M. Parental Barriers in Seeking Mental Health Services for Attention Deficit Hyperactivity Disorder in Children: Systematic Review. Journal of attention disorders. 2022;26(3):408-25.		Not a direct link between ADHD and topic disucssed
A. L, C. D, C. C, S. MM, R.A.P. R, L. B, et al. A meta-analysis of executive functioning in dyslexia with consideration of the impact of comorbid ADHD. Journal of Cognitive Psychology. 2019;31(7):725-49.		Not solely ADHD findings or no ADHD specific results
A. S, W. K. Role of early childhood adversity, behaviour problems and academic performance among adolescents with adhd: A systematic review. Journal of Clinical and Diagnostic Research. 2021;15(2):VE01-VE4.	yes it feels like risk factors,	Risk factors
A. S. Moodiness related to anxiety and obsessive-compulsive disorders in children with attention-deficit/hyperactivity disorder. Journal of the American Academy of Child and Adolescent Psychiatry. 2017;56(10):S95.		Not solely ADHD findings or no ADHD specific results
A. VDK, C. B, R.-J. VDG, J. B, L. H-VR, M. VA. A systematic review of the burden of illness (BOI) of attention deficit hyperactivity disorder (ADHD) regarding educational performance and work. Journal of Mental Health Policy and Economics. 2011;14:S36-S7.		No full text, no response from authors or contact details
A.C. S, M.I. L, Soetjipto, Y. S. Systematic review of gut microbiota and attention-deficit hyperactivity disorder (ADHD). Annals of General Psychiatry. 2021;20(1):12.		Biological link
A.P. M-N, I. T. Review of adult attention-deficit/hyperactivity disorder in South Africa. Expert Review of Pharmacoeconomics and Outcomes Research. 2017;17(4):343-53.	ADHD in south africa	Not a direct link between ADHD and topic disucssed
Angriman M, Bruni O, Cortese S. Does Restless Legs Syndrome increase cardiovascular risk in Attention-Deficit/Hyperactivity Disorder? Medical Hypotheses. 2013;80(1):39-42.	Not directly related to ADHD	Not solely ADHD findings or no ADHD specific results
Arico M, Arigliani E, Giannotti F, Romani M. ADHD and ADHD-related neural networks in benign epilepsy with centrotemporal spikes: A systematic review. Epilepsy & behavior : E&B. 2020;112(100892858):107448.		Not a direct link between ADHD and topic disucssed
Arrondo G, Solmi M, Dragioti E, Eudave L, Ruiz-Goikoetxea M, Ciaurriz-Larraz AM, et al. Associations between mental and physical conditions in children and adolescents: An umbrella review. Neuroscience and biobehavioral reviews. 2022;137:104662.		Not solely ADHD findings or no ADHD specific results
Athanasiadou A, Buitelaar JK, Brovedani P, Chorna O, Fulceri F, Guzzetta A, et al. Early motor signs of attention-deficit hyperactivity disorder: a systematic review. European child & adolescent psychiatry. 2020;29(7):903-16.		Risk factors
Bálint S, Czobor P, Mészáros A, Simon V, Bitter I. Neuropsychological impairments in adult attention deficit hyperactivity disorder: a literature review. Psychiatria Hungarica : A Magyar Pszichiátriai Társaság tudományos folyóirata. 2008;23(5):324-35.		No English version
Barth B, Kroczek A, Deppermann S, Dresler T, Fallgatter AJ, Ehlis A-C. Epidemiology and Pathogenesis of the Comorbidity of Attention-Deficit/Hyperactivity Disorder (ADHD) and Addiction the Role of Executive Functions. Sucht. 2015;61(5):279-91.	and epidemiology	Mechanisms
Barth GM, Renner TJ. ADHD and internet addiction in children and adolescents. Sucht. 2015;61(5):293-301.		No English version
Bartoli F, Callovini T, Calabrese A, Cioni RM, Riboldi I, Crocamo C, et al. Disentangling the Association between ADHD and Alcohol Use Disorder in Individuals Suffering from Bipolar Disorder: A Systematic Review and Meta-Analysis. Brain Sciences. 2022;12(1).		Not solely ADHD findings or no ADHD specific results
Beheshti A, Chavanon M-L, Christiansen H. Emotion dysregulation in adults with attention deficit hyperactivity disorder: a meta-analysis. BMC psychiatry. 2020;20(1):120.	Emotion dyregulation	ADHD & executive function
Biancardi C, Sesso G, Masi G, Faraguna U, Sicca F. Sleep EEG microstructure in children and adolescents with attention deficit hyperactivity disorder: a systematic review and meta-analysis. Sleep. 2021;44(7).		Not a direct link between ADHD and topic disucssed
Biederman, J., Feinberg, L., Chan, J., Adeyemo, B. O., Woodworth, K. Y., Panis, W., ... & Faraone, S. V. (2015). Mild traumatic brain injury and attention-deficit hyperactivity disorder in young student athletes. The Journal of nervous and mental disease, 203(11), 813.	Not a review	Not a review
Bjerrum, M. B., Pedersen, P. U., & Larsen, P. (2017). Living with symptoms of attention deficit hyperactivity disorder in adulthood: a systematic review of qualitative evidence. JBI Evidence Synthesis, 15(4), 1080-1153.	About strategis, protective factors,	Not a direct link between ADHD and topic disucssed
Bonham MD, Shanley DC, Waters AM, Elvin OM. Inhibitory Control Deficits in Children with Oppositional Defiant Disorder and Conduct Disorder Compared to Attention Deficit/Hyperactivity Disorder: A Systematic Review and Meta-analysis. J Abnorm Child Psychol. 2020.	Not direct comparison	Not solely ADHD findings or no ADHD specific results
Burnett KA. Comorbidity between attention deficit/hyperactivity disorder (AD/HD) and borderline personality disorder (BPD): A systematic overview of current literature. Dissertation Abstracts International: Section B: The Sciences and Engineering. 2021;82(5):No-Specified.		Not peer reviewed
C. G, S. Y, J. K, P. H, H. C. Long-term outcomes of attention deficit/ hyperactivity disorder (ADHD): A systematic review of untreated and treated outcome results in Australasia and rest-of-world. Australian and New Zealand Journal of Psychiatry. 2013;47:82.		Treatment/treatment outcomes
C. G, S. Y, J. K, P. H, H. C. Long-term outcomes of attention deficit/hyperactivity disorder (ADHD): A systematic review of publication trends in Australasia and other world regions. Australian and New Zealand Journal of Psychiatry. 2013;47:81-2.		Not a direct link between ADHD and topic disucssed
Cheng S, Coghill D, Zendarski N. A rapid systematic review of attention-deficit/hyperactivity disorder (ADHD) and high order writing: Current findings and implications for intervention. Research in Developmental Disabilities. 2022;123.	Include	ADHD & executive function
Cheung K, Theule J. Parental Psychopathology in Families of Children with ADHD: A Meta-analysis. Journal of Child and Family Studies. 2016;25(12):3451-61.		Not a direct link between ADHD and topic disucssed
Childress AC, Yu KR, Cuthbertson L. Early Morning ADHD Symptoms and Functional Impairment: Impact on Patients and Caregivers, and Pharmacological Approaches to Management. CNS drugs. 2023;37(1):31-44.		Treatment/treatment outcomes
Consoli A, Bouzamondo A, Guile J-M, Lechat P, Cohen D. Comorbidity with ADHD decreases response to pharmacotherapy in children and adolescents with acute mania: evidence from a metaanalysis. Canadian journal of psychiatry Revue canadienne de psychiatrie. 2007;52(5):323-8.		Not a direct link between ADHD and topic disucssed
Cooke T, So T-Y. Attention deficit hyperactive disorder and occurrence of tic disorders in children and adolescents—what is the verdict. Current Pediatric Reviews. 2016;12(3):230-8.	yes it is another ND	neurodiversity comorbidity, no ADHD specific results
Cortese S, Hill CM. Sleep and ADHD: Adding pieces to the puzzle. Sleep Med. 2023;103:144-5.		Not peer reviewed
Cortese S. ADHD: Overweight and obesity. Medecine Therapeutique Pediatrie. 2016;19(3):225-9.		No English version
Coutinho-Souto WKS, de Souza Fleith D. Giftedness and ADHD: A systematic literature review. Revista de Psicologia (Peru). 2022;40(2):1175-211.		No English version
Crow AJD, Janssen JM, Vickers KL, Parish-Morris J, Moberg PJ, Roalf DR. Olfactory Dysfunction in Neurodevelopmental Disorders: A Meta-analytic Review of Autism Spectrum Disorders, Attention Deficit/Hyperactivity Disorder and Obsessive–Compulsive Disorder. Journal of Autism and Developmental Disorders. 2020;50(8):2685-97.		Not solely ADHD findings or no ADHD specific results
D’Agati E, Curatolo P, Mazzone L. Comorbidity between ADHD and anxiety disorders across the lifespan. International Journal of Psychiatry in Clinical Practice. 2019;23(4):238-44.		Management of ADHD
Da Costa, I. S., & Mota, M. (2022). Neurodevelopmental disorders and gender dysphoria: a fertile relationship?. European Psychiatry, 65(S1), S806-S806.	conference abstract	Not peer reviewed
Daucourt MC, Erbeli F, Little CW, Haughbrook R, Hart SA. A Meta-Analytical Review of the Genetic and Environmental Correlations between Reading and Attention-Deficit/Hyperactivity Disorder Symptoms and Reading and Math. Scientific Studies of Reading. 2020;24(1):23-56.		genetic study
Davoody S, Goeschl S, Dolatshahi M, Davari-Ashtiani R, Saffarpour R, Sodeifian F, et al. Relation between ADHD and COVID-19: A Narrative Review to Guide Advancing Clinical Research and Therapy. Iranian journal of psychiatry. 2022;17(1):110-7.		Not a direct link between ADHD and topic disucssed
de Velasco RM, Barbudo E, Perez-Templado J, Silveira B, Quintero J. Review of the association between obesity and ADHD. Actas Espanolas de Psiquiatria. 2015;43(1):16-23.	mechansims for obesity and ADHD	Mechanisms
Deault LC. A systematic review of parenting in relation to the development of comorbidities and functional impairments in children with Attention-Deficit/ Hyperactivity Disorder (ADHD). Child Psychiatry and Human Development. 2010;41(2):168-92.		Not a direct link between ADHD and topic disucssed
Dekkers TJ, Agelink van Rentergem JA, Huizenga HM, Raber H, Shoham R, Popma A, et al. Decision-Making Deficits in ADHD Are Not Related to Risk Seeking But to Suboptimal Decision-Making: Meta-Analytical and Novel Experimental Evidence. Journal of Attention Disorders. 2021;25(4):486-501.		Mechanisms
Del-Ponte B, Quinte GC, Cruz S, Grellert M, Santos IS. Dietary patterns and attention deficit/hyperactivity disorder (ADHD): A systematic review and meta-analysis. Journal of affective disorders. 2019;252:160-73.		Risk factors
Dickstein DP, Xavier Castellanos F. Face processing in attention deficit/hyperactivity disorder. Current Topics in Behavioral Neurosciences. 2012;9:219-37.	Face processing	ADHD & executive function
Dirks H, Scherbaum N, Kis B, Mette C. ADHD in Adults and Comorbid Substance Use Disorder: Prevalence, Clinical Diagnostics and Integrated Therapy. Fortschritte der Neurologie Psychiatrie. 2017;85(6):336-44.	Not in english	No English version
Doshi JA, Hodgkins P, Kahle J, Sikirica V, Cangelosi MJ, Setyawan J, et al. Economic impact of childhood and adult attention-deficit/hyperactivity disorder in the United States. Journal of the American Academy of Child and Adolescent Psychiatry. 2012;51(10):990-1002.e2.		Not a direct link between ADHD and topic disucssed
Doyle AE. Executive functions in attention-deficit/hyperactivity disorder. The Journal of clinical psychiatry. 2006;67:21-6.	Executive functions	ADHD & executive function
Duffy A. The nature of the association between childhood ADHD and the development of bipolar disorder: a review of prospective high-risk studies. The American journal of psychiatry. 2012;169(12):1247-55.		Risk factors
E. H, L. G. Disturbed sleep in children with ADHD: Is there a place for melatonin as a treatment option? Tijdschrift voor Psychiatrie. 2013;55(5):349-57.		Treatment/treatment outcomes
Effatpanah M, Rezaei M, Effatpanah H, Effatpanah Z, Varkaneh HK, Mousavi SM, et al. Magnesium status and attention deficit hyperactivity disorder (ADHD): A meta-analysis. Psychiatry Res. 2019;274:228-34.		Biological link
El Archi S, Cortese S, Ballon N, Reveillere C, De Luca A, Barrault S, et al. Negative Affectivity and Emotion Dysregulation as Mediators between ADHD and Disordered Eating: A Systematic Review. Nutrients. 2020;12(11).	Mechanisms	Mechanisms
Fluegge K. A reply to sleep characteristics in children with attention deficit hyperactivity disorder: Systematic review and meta-analyses by Díaz-Román et al. Journal of Clinical Sleep Medicine. 2016;12(6):933.		Not peer reviewed
Fowler M. The effect of ADHD on academic achievement: A meta-analytic review. Dissertation Abstracts International: Section B: The Sciences and Engineering. 2016;77(4):No-Specified.		Not peer reviewed
Frazier, T. W., Youngstrom, E. A., Glutting, J. J., & Watkins, M. W. (2007). ADHD and achievement: Meta-analysis of the child, adolescent, and adult literatures and a concomitant study with college students. Journal of learning disabilities, 40(1), 49-65.	reading, writing etc	ADHD & executive function
Frodl T. Comorbidity of ADHD and Substance Use Disorder (SUD): A Neuroimaging Perspective. Journal of Attention Disorders. 2010;14(2):109-20.	neuroimaging study on overlap biology	Biological link
G. M, R. C, H. P. 51.2 CHALLENGES WITH MANAGING CHILDREN AND ADOLESCENTS WITH ADHD DURING THE COVID-19 PANDEMIC: A REVIEW OF THE LITERATURE. Journal of the American Academy of Child and Adolescent Psychiatry. 2020;59(10):S251.	conference abstract	Not peer reviewed
Galland D, Tisserant I, Notardonato L. “Attention deficit hyperactivity disorder in forensic psychiatry: A review”. Encephale. 2017;43(3):268-72.		No English version
Gering A, Fourneret P, Poulet E, Geoffray M-M, Jurek L. [ADHD during childhood and subsequent psychotic disorder: A link?]. TDAH dans l'enfance et trouble psychotique a l'age adulte : quel lien ? 2021;47(5):484-90.	not in English	No English version
Goldstein BI, Korczak DJ. Links Between Child and Adolescent Psychiatric Disorders and Cardiovascular Risk. The Canadian journal of cardiology. 2020;36(9):1394-405.		Not solely ADHD findings or no ADHD specific results
Graziano PA, Garcia A. Attention-deficit hyperactivity disorder and children's emotion dysregulation: A meta-analysis. Clinical psychology review. 2016;46:106-23.	emotion regulation	ADHD & executive function
Grunblatt E, Homolak J, Babic Perhoc A, Davor V, Knezovic A, Osmanovic Barilar J, et al. From attention-deficit hyperactivity disorder to sporadic Alzheimer's disease-Wnt/mTOR pathways hypothesis. Frontiers in neuroscience. 2023;17(101478481):1104985.		genetic study
H.A. P, S.M. S, J. K, K.D. W. A systematic review of attention-deficit hyperactivity disorder in individuals living with cystic fibrosis. Pediatric Pulmonology. 2020;55:280-1.	Conference abstract and link with cystic fibrosis	Not peer reviewed
H.E. E, R.E. N, A.J. F, G.C.K. C, W.E. C, H.A. W, et al. Long-Term Outcomes of Attention-Deficit/Hyperactivity Disorder and Conduct Disorder: A Systematic Review and Meta-Analysis. Journal of the American Academy of Child and Adolescent Psychiatry. 2016;55(10):841-50.		Not solely ADHD findings or no ADHD specific results
Hanc T, Cortese S. Attention deficit/hyperactivity-disorder and obesity: A review and model of current hypotheses explaining their comorbidity. Neuroscience and biobehavioral reviews. 2018;92:16-28.	Biopsychosocial model for ADHD and obesity	Biological link
Harpin, V., Mazzone, L., Raynaud, J. P., Kahle, J., & Hodgkins, P. (2016). Long-term outcomes of ADHD: a systematic review of self-esteem and social function. Journal of attention disorders, 20(4), 295-305.	treatment outcomes	Treatment/treatment outcomes
Harvey WJ, Reid G. Attention-deficit/hyperactivity disorder: A review of research on movement skill performance and physical fitness. Adapted Physical Activity Quarterly. 2003;20(1):1-25.	Movement skills	ADHD & executive function
Hellström L. A systematic review of polyvictimization among children with attention deficit hyperactivity or autism spectrum disorder. International Journal of Environmental Research and Public Health. 2019;16(13).		Not solely ADHD findings or no ADHD specific results
Huang-Pollock CL, Karalunas SL, Tam H, Moore AN. Evaluating vigilance deficits in ADHD: A meta-analysis of CPT performance. Journal of Abnormal Psychology. 2012;121(2):360-71.	Cognitive testing	Cognitive test
I. P, V. N, M. M, J. T. Comorbid adult adhd and bipolar affective disorder - assessment challenges. European Psychiatry. 2021;64:S194-S5.	conference abstract	Not peer reviewed
I. T, V. M, A. M, J. D, N. S, D. B, et al. The impact of attention-deficit/hyperactivity disorder on bariatric surgery outcomes: systematic review and metaanalysis. CMAJ Canadian Medical Association Journal. 2019;62(4):S167.	conference abstract	Not peer reviewed
J. B. 4.1 RELATIONSHIP BETWEEN ADHD AND PTSD: A SYSTEMATIC REVIEW AND META-ANALYSIS. Journal of the American Academy of Child and Adolescent Psychiatry. 2021;60(10):S264.	conference abstract	Not peer reviewed
J. M, M. B, A. T, R. G. Living on the edge: a review on potential risk factors for suicide in adult attention-deficit/hyperactivity disorder. European Psychiatry. 2022;65:S184.	conference abstract	Not peer reviewed
James A. Completed suicide, ideation and attempts in attention deficit hyperactivity disorder. Acta Psychiatrica Scandinavica. 2012;125(2):91-2.	editorial comment	Not peer reviewed
Jillani SA, Kaminer Y. High risk driving in treated and untreated youth with attention deficit hyperactivity disorder: Public health implications. Adolescent Psychiatry. 2016;6(2):89-99.		Treatment/treatment outcomes
K. F, D.R. L. The relation between attention deficit hyperactivity disorder and substance abuse: what role does conduct disorder play? Clinical child and family psychology review. 2003;6(1):1-16.	Not just ADHD, include Conduct disorders	Not solely ADHD findings or no ADHD specific results
K. Y. Substance-related and addictive disorders as a risk factor of suicide and homicide among patients with ADHD: A mini review. Current Drug Abuse Reviews. 2016;9(2):80-6.	substance, adhd and homicide 3 levels	Risk factors
Kanevski M, Booth JN, Oldridge J, McDougal E, Stewart TM, McGeown S, et al. [Formula: see text]The relationship between cognition and mathematics in children with attention-deficit/hyperactivity disorder: a systematic review. Child neuropsychology : a journal on normal and abnormal development in childhood and adolescence. 2022;28(3):394-426.	math and cognition, its mechanisms not direct risks	Mechanisms
Karteczka-Swietek K, Opozda-Suder S, Strojny A. Psychosocial functioning of adolescents with ADHD in the family, school and peer group: A scoping review protocol. PLoS ONE. 2022;17(6).	Protocol not a study	Not peer reviewed
Kirova A-M, Kelberman C, Storch B, DiSalvo M, Woodworth KY, Faraone SV, et al. Are subsyndromal manifestations of attention deficit hyperactivity disorder morbid in children? A systematic qualitative review of the literature with meta-analysis. Psychiatry Res. 2019;274:75-90.		Mechanisms
Knecht, C., de Alvaro, R., Martinez-Raga, J., Balanza-Martinez, V., & Carabal, E. (2015). Criminality and attention deficit hyperactivity disorder. Forensic Psychiatry: A Public Health Perspective, 119-138.		No full text, no response from authors or contact details
Koenig J, Rash JA, Kemp AH, Buchhorn R, Thayer JF, Kaess M. Resting state vagal tone in attention deficit (hyperactivity) disorder: A meta-analysis. World Journal of Biological Psychiatry. 2017;18(4):256-67.	Vagal tone	Biological link
Kofler MJ, Rapport MD, Sarver DE, Raiker JS, Orban SA, Friedman LM, et al. Reaction time variability in ADHD: A meta-analytic review of 319 studies. Clinical Psychology Review. 2013;33(6):795-811.	reaction time	Cognitive test
Kooij JS, Bijlenga D. The circadian rhythm in adult attention-deficit/hyperactivity disorder: Current state of affairs. Expert Review of Neurotherapeutics. 2013;13(10):1107-16.	circadian rhytme	Biological link
Korrel H, Mueller KL, Silk T, Anderson V, Sciberras E. Research Review: Language problems in children with Attention-Deficit Hyperactivity Disorder – a systematic meta-analytic review. Journal of Child Psychology and Psychiatry and Allied Disciplines. 2017;58(6):640-54.	language	ADHD & executive function
L. E, J. W, S. K, L. S. Adolescent experiences of living with a diagnosis of ADHD: a systematic review and thematic synthesis. Emotional and Behavioural Difficulties. 2019;24(2):119-35.	experiences of ADHD	Not a direct link between ADHD and topic disucssed
L. R, P. I. ADHD and obesity: A narrative review from the perspective of a child psychiatrist. Neuropsychiatrie de l'Enfance et de l'Adolescence. 2022.	factors to link ADHD-obesity	Risk factors
Lanier J, Noyes E, Biederman J. Mind Wandering (Internal Distractibility) in ADHD: A Literature Review. Journal of attention disorders. 2021;25(6):885-90.	Mind wondering	ADHD & executive function
LeGris J, Boylan K, Stead V, Beyfuss K, Chan A. Developmental Risk Relationships between ADHD and Depressive Disorders in Childhood. Current Developmental Disorders Reports. 2016;3(1):25-32.	mechansisms linking dpression and adhd	Mechanisms
Leibson CL, Long KH. Economic Implications of Attention-Deficit Hyperactivity Disorder for Healthcare Systems. PharmacoEconomics. 2003;21(17):1239-62.	economic implication	Not a direct link between ADHD and topic disucssed
Leroy A, Spotorno S, Faure S. Emotional scene processing in children and adolescents with attention deficit/hyperactivity disorder: a systematic review. European child & adolescent psychiatry. 2021;30(3):331-46.	scene/emotion processing	ADHD & executive function
Lijffijt M, Kenemans JL, Verbaten MN, Van Engeland H. A meta-analytic review of stopping performance in attention-deficit/ hyperactivity disorder: Deficient inhibitory motor control? Journal of Abnormal Psychology. 2005;114(2):216-22.	Inhibitorry motor control	ADHD & executive function
Lilienfeld SO, Waldman ID. The relation between childhood attention-deficit hyperactivity disorder and adult antisocial behavior reexamined: The problem of heterogeneity. Clinical Psychology Review. 1990;10(6):699-725.		Not a direct link between ADHD and topic disucssed
Liu W-J, Mao H-J, Hu L-L, Song M-F, Jiang H-Y, Zhang L. Attention-deficit/hyperactivity disorder medication and risk of suicide attempt: A meta-analysis of observational studies. Pharmacoepidemiology and drug safety. 2020;29(11):1364-72.	study on impact of meds on suicide	Treatment/treatment outcomes
M. I, R. H. Suicidality in ADHD: A review. European Psychiatry. 2011;26.		No full text, no response from authors or contact details
M. K, J.N. B, J. O, E. M, T.M. S, S. M, et al. The relationship between cognition and mathematics in children with attention-deficit/hyperactivity disorder: a systematic review. Child Neuropsychology. 2022;28(3):394-426.	cognition and math and ADHD	ADHD & executive function
M. K. Possible relationships of addictive disorders and attention deficit hyperactivity disorder (ADHD). European Psychiatry. 2021;64:S172.	conference abstract	Not peer reviewed	substance use
M.C. CB, J.M. HS, F. ML, M.D.L.A. CN, A. PS. ADHD, one of the most challenging mental disorders in adult psychopathology. European Psychiatry. 2016;33:S627-S8.	comorbidities and diagnossi	Diagnosis/Assessment
M.C. F, N. C, W. B, A. G. ATTENTION DEFICIT HYPERACTIVITY DISORDER AND FALLS IN OLDER ADULTS. Alzheimer's and Dementia. 2019;15(7):P1480.	conference abstract	Not peer reviewed
M.-L. K, M.M. S, J.-M. A, R.H. G. What is the evidence of impaired motor skills and motor control among children with attention deficit hyperactivity disorder (ADHD)? Systematic review of the literature. Research in Developmental Disabilities. 2015;36:338-57.	motor skills	ADHD & executive function
Mayer JS, Bernhard A, Fann N, Boxhoorn S, Hartman CA, Reif A, et al. Cognitive mechanisms underlying depressive disorders in ADHD: A systematic review. Neuroscience and biobehavioral reviews. 2021;121:307-45.	Cogn mechanisms, not links	Mechanisms
Meque, I., et al. (2019). Predictors of Alcohol Use Disorders among Young Adults: A Systematic Review of Longitudinal Studies. Alcohol and Alcoholism 54(3): 310-324.		Not solely ADHD findings or no ADHD specific results
Moukhtarian TR, Mintah RS, Moran P, Asherson P. Emotion dysregulation in attention-deficit/hyperactivity disorder and borderline personality disorder. Borderline Personality Disorder and Emotion Dysregulation. 2018;5.	BPD and ADHD, and EF	Not solely ADHD findings and Executive fundtion
Musella KE, Weyandt LL. Attention-deficit hyperactivity disorder and youth's emotion dysregulation: A systematic review of fMRI studies. Applied neuropsychology Child. 2022(101584990):1-14.	emotion regulation FMRI studies	ADHD & executive function
N. C, M.B. M, B.V. P. Relationship between sluggish cognitive tempo and attention deficit hyperactivity disorder in children: Current status and perspective. Revista Chilena de Neuro-Psiquiatria. 2021;59(2):125-41.		Cognitive test
Nigg JT, Blaskey LG, Huang-Pollock CL, Hinshaw SP, John OP, Willcutt EG, et al. Big five dimensions and ADHD symptoms: Links between personality traits and clinical symptoms. Journal of Personality and Social Psychology. 2002;83(2):451-69.	personality test	Cognitive test
O'Hara VM, Curran JL, Browne NT. The Co-occurrence of Pediatric Obesity and ADHD: an Understanding of Shared Pathophysiology and Implications for Collaborative Management. Curr Obes Rep. 2020;9(4):451-61.	brainb corelates	Mechanisms
P. H, H. C, S. Y, J. K, L.E. A. Attention deficit/hyperactivity disorder and psychiatric comorbidities: A systematic review of long-term outcomes. European Child and Adolescent Psychiatry. 2013;22(2):S239.		Not peer reviewed
Pastura GMC, Mattos P, Araújo APQC. School achievement and attention deficit hyperactivity disorder. Revista de Psiquiatria Clinica. 2005;32(6):324-9.		No English version
Pockett C, Kirk V. Periodic limb movements in sleep and attention deficit hyperactivity disorder: Are they related? Paediatrics and Child Health. 2006;11(6):355-8.	do[pamine production and similarities	Not a direct link between ADHD and topic disucssed
Polanczyk G, Jensen P. Epidemiologic Considerations in Attention Deficit Hyperactivity Disorder: A Review and Update. Child and Adolescent Psychiatric Clinics of North America. 2008;17(2):245-60.	epideniology study	prevalence and epidemiology
Polderman TJC, Boomsma DI, Bartels M, Verhulst FC, Huizink AC. A systematic review of prospective studies on attention problems and academic achievement. Acta psychiatrica Scandinavica. 2010;122(4):271-84.	academic achievement and attention problems	Not solely ADHD findings or no ADHD specific results
Poysophon P, Rao AL. Neurocognitive Deficits Associated With ADHD in Athletes: A Systematic Review. Sports health. 2018;10(4):317-26.	neurocognitive defficit in athletes	risk factors and executive functions
Pujalte GGA, Maynard JR, Thurston MJ, Taylor WCr, Chauhan M. Considerations in the Care of Athletes With Attention Deficit Hyperactivity Disorder. Clinical journal of sport medicine : official journal of the Canadian Academy of Sport Medicine. 2019;29(3):245-56.	athletes and adhd	Treatment/treatment outcomes
R. F, J. A, A. H, L. F, A. P, J. B. Does Working Memory Impact Functional Outcomes in Individuals With ADHD: A Qualitative and Comprehensive Literature Review. Journal of attention disorders. 2019;23(13):1592-9.	WM	ADHD & executive function
R. G, A. M, D. L, J. C. Adult psychiatric comorbidities of attention-deficit hyperactivity disorder diagnosed in childhood-systematic review. European Psychiatry. 2015;30:988.		No full text, no response from authors or contact details
Racicka, E. (2013). Correlations between attention deficit hyperactivity disorder and obesity-a systematic review of the literature. Psychiatria polska, 47(1), 89-102.		No full text, no response from authors or contact details
Ramos AA, Hamdan AC, Machado L. A meta-analysis on verbal working memory in children and adolescents with ADHD. The Clinical neuropsychologist. 2020;34(5):873-98.	working memory	ADHD & executive function
Regnart J, Truter I, Meyer A. Critical exploration of co-occurring Attention-Deficit/Hyperactivity Disorder, mood disorder and Substance Use Disorder. Expert Review of Pharmacoeconomics and Outcomes Research. 2017;17(3):275-82.	adhd mood disorder and SUD, 3 levels	Not solely ADHD findings or no ADHD specific results
Robe A, Dobrean A, Cristea IA, Păsărelu CR, Predescu E. Attention-deficit/hyperactivity disorder and task-related heart rate variability: A systematic review and meta-analysis. Neuroscience and Biobehavioral Reviews. 2019;99:11-22.		Mechanisms
Rodrigues T, Shigaeff N. Sleep disorders and attention: a systematic review. Arquivos de neuro-psiquiatria. 2022;80(5):530-8.	sleep and attention	Not solely ADHD findings or no ADHD specific results
Romani M, Vigliante M, Faedda N, Rossetti S, Pezzuti L, Guidetti V, et al. Face memory and face recognition in children and adolescents with attention deficit hyperactivity disorder: A systematic review. Neuroscience and Biobehavioral Reviews. 2018;89:1-12.	face memory	ADHD & executive function
Roy A. The relationships between attention-deficit/hyperactive disorder (ADHD), conduct disorder (CD) and problematic drug use (PDU). Drugs: Education, Prevention and Policy. 2008;15(1):55-75.	conduct disorder and adhd and SUD	Not solely ADHD findings or no ADHD specific results
S. B, J. T, P. P, P. S. Excessive Daytime Sleepiness Measurements in Children With Attention Deficit Hyperactivity Disorder. Frontiers in Psychiatry. 2020;11:3.	paper on assesment of sleep in adhd	Diagnosis/Assessment
S. C, C.M. P. Comorbidity between ADHD and obesity: Exploring shared mechanisms and clinical implications. Postgrad Med. 2010;122(5):88-96.	mechanisms obesity and adhd	Mechanisms
S. C, F.X. C. The relationship between ADHD and obesity: Implications for therapy. Expert Review of Neurotherapeutics. 2014;14(5):473-9.	obesity and adhd treatment	Treatment/treatment outcomes
S. C, L. T, H. S, G. T. The profile of pragmatic language impairments in children with ADHD: A systematic review. Development and psychopathology. 2021:1-23.	language impairment executive fundtion?	ADHD & executive function
S. C. Obesity in ADHD. ADHD Attention Deficit and Hyperactivity Disorders. 2015;7:S3.	Conference abstract	Not peer reviewed
S. M, K. S, S. M, A. T. Quality of life assessments in adults with attention deficit/hyperactivity disorder - A systematic review. Value in Health. 2011;14(7):A327-A8.	Conference abstract	Not peer reviewed
S.L. P, C.A.P. W, S.C. H, W.E. P, B.S.G. M. Understanding the association between childhood ADHD and adult impulsivity facets and alcohol problems. Alcoholism: Clinical and Experimental Research. 2015;39:270A.	Conference abstract	Not peer reviewed
S.R. H, P.H. T, S. L. The early motor development in children diagnosed with ADHD: a systematic review. ADHD Attention Deficit and Hyperactivity Disorders. 2019;11(3):233-40.	mortor skills	ADHD & executive function
Saccaro LF, Schilliger Z, Perroud N, Piguet C. Inflammation, anxiety, and stress in attention-deficit/ hyperactivity disorder. Biomedicines. 2021;9(10).	Stress, inflamation and ADHD relationship/mechanisms	Mechanisms
Scarpelli S, Gorgoni M, D’atri A, Reda F, De Gennaro L. Advances in understanding the relationship between sleep and attention deficit-hyperactivity disorder (ADHD). Journal of Clinical Medicine. 2019;8(10).	sleep and adhd REM and wave activity	Mechanisms
Schmitt J, Apfelbacher C, Heinrich J, Weidinger S, Romanos M. Association of atopic eczema and attention-deficit/hyperactivity disorder - Meta-analysis of epidemiologic studies. Zeitschrift fur Kinder- und Jugendpsychiatrie und Psychotherapie. 2013;41(1):35-44.		No full text, no response from authors or contact details
Schoenfelder EN, Kollins SH. Topical Review: ADHD and Health-Risk Behaviors: Toward Prevention and Health Promotion. Journal of pediatric psychology. 2016;41(7):735-40.	mechanisms of health risk	Mechanisms
Sebastian, A., Retz, W., Tüscher, O., & Turner, D. (2019). Violent offending in borderline personality disorder and attention deficit/hyperactivity disorder. Neuropharmacology, 156, 107565.	ADHD and BPD	Not solely ADHD findings or no ADHD specific results
Serra-Pinheiro MA, Coutinho ESF, Souza IS, Pinna C, Fortes D, Araujo C, et al. Is ADHD a Risk Factor Independent of Conduct Disorder for Illicit Substance Use? A Meta-Analysis and Meta-Regression Investigation. Journal of Attention Disorders. 2013;17(6):459-69.	adhd and ocd and SUD 3 levels	Not solely ADHD findings or no ADHD specific results
Shareghfarid E, Sangsefidi ZS, Salehi-Abargouei A, Hosseinzadeh M. Empirically derived dietary patterns and food groups intake in relation with Attention Deficit/Hyperactivity Disorder (ADHD): A systematic review and meta-analysis. Clinical nutrition ESPEN. 2020;36(101654592):28-35.	dietary pattern	risk factors
Simmons JA, Antshel KM. Bullying and Depression in Youth with ADHD: A Systematic Review. Child and Youth Care Forum. 2021;50(3):379-414.	Not a direct impact, 3 levels	Not a direct link between ADHD and topic disucssed
Soldati L, Bianchi-Demicheli F, Schockaert P, Kohl J, Bolmont M, Hasler R, et al. Association of ADHD and hypersexuality and paraphilias. Psychiatry Res. 2021;295:113638.	Not a direct impact, 3 levels	Not a direct link between ADHD and topic disucssed
Soler-Gutiérrez A-M, Pérez-González J-C, Mayas J. Evidence of emotion dysregulation as a core symptom of adult ADHD: A systematic review. PLoS ONE. 2023;18(1).	emotion regulation	ADHD & executive function
Spencer, A. E., Faraone, S. V., Bogucki, O. E., Pope, A. L., Uchida, M., Milad, M. R., ... & Biederman, J. (2016). Examining the association between posttraumatic stress disorder and attention-deficit/hyperactivity disorder: a systematic review and meta-analysis. The Journal of clinical psychiatry, 77(1), 6862.		No full text, no response from authors or contact details
Srichawla, B. S., Telles, C. C., Schweitzer, M., Darwish, B., & Darwish, B. A. (2022). Attention Deficit Hyperactivity Disorder and Substance Use Disorder: A Narrative Review. Cureus, 14(4).	Mechanisms, teartemntes etc	Treatment/treatment outcomes
T. W. 47.3 ADHD AND SUBSTANCE USE/ABUSE IN TEENAGERS. Journal of the American Academy of Child and Adolescent Psychiatry. 2021;60(10):S70.		Not peer reviewed
Tannoia DP, Lease AM. The relation of inattention and hyperactivity-impulsivity to peer dislike: An examination of potential mediators. School psychology (Washington, DC). 2022;37(6):478-87.	study not a review	Not a review
V. M, I. T, A. M, J.T. D, N. S, D.W. B, et al. The Impact of ADHD on Outcomes Following Bariatric Surgery: a Systematic Review and Meta-analysis. Obesity Surgery. 2019;29(4):1403-9.	impact of surgery	Not a direct link between ADHD and topic disucssed
van der Schans, J., Cicek, R., de Vries, T. W., Hak, E., & Hoekstra, P. J. (2017). Association of atopic diseases and attention-deficit/hyperactivity disorder: A systematic review and meta-analyses. Neuroscience & Biobehavioral Reviews, 74, 139-148.	risk factors	risk factors
van Emmerik-van Oortmerssen K, Crunelle CL, Carpentier PJ. [Substance use disorders and ADHD: an overview of recent Dutch research]. Tijdschrift voor psychiatrie. 2013;55(11):861-6.	SUD but in Dutch	No English version
van Stralen J. Emotional dysregulation in children with attention-deficit/hyperactivity disorder. ADHD Attention Deficit and Hyperactivity Disorders. 2016;8(4):175-87.	emotion dysregulation	ADHD & executive function		236
Wang N, Gao X, Zhang Z, Yang L. Composition of the Gut Microbiota in Attention Deficit Hyperactivity Disorder: A Systematic Review and Meta-Analysis. Frontiers in endocrinology. 2022;13(101555782):838941.	Gut microbiota	Biological link
Wang S, Zhang X-Y, Liu H-Z. Need for further analysis to explore the association between ADHD and asthma. The Lancet Psychiatry. 2018;5(12):963.	conference abstract	Not peer reviewed
Waschbusch DA, Andrade BF, King S. Attention-deficit/hyperactivity disorder. Child and adolescent psychopathology: Theoretical and clinical implications. 2006:52-77.		No full text, no response from authors or contact details
Waschbusch DA, Andrade BF, King S. Attention-deficit/hyperactivity disorder. Child and adolescent psychopathology: Theoretical and clinical implications. 2006:52-77.	psychopathology	Treatment/treatment outcomes
Wilens TE, Morrison NR. The intersection of attention-deficit/hyperactivity disorder and substance abuse. Curr Opin Psychiatry. 2011;24(4):280-5.		No full text, no response from authors or contact details
Witthoft J, Koglin U, Petermann F. Comorbidity of aggressive behavior and ADHD. Zur komorbiditat von aggressivem verhalten und ADHS. 2010;19(4):218-27.	In german	No English version
Zheng Q, Wang X, Chiu KY, Shum KK-M. Time Perception Deficits in Children and Adolescents with ADHD: A Meta-analysis. Journal of Attention Disorders. 2022;26(2):267-81.	Exclude	ADHD & executive function
Zulauf CA, Sprich SE, Safren SA, Wilens TE. The complicated relationship between attention deficit/hyperactivity disorder and substance use disorders. Current Psychiatry Reports. 2014;16(3):436.	SUD and treatment	Treatment/treatment outcomes
